1 **Running Head:** Maize responses to caterpillar infestation

2

3 **TITLE:** *Spodoptera exigua* caterpillar feeding induces rapid defense responses in maize leaves

4

5 **AUTHORS:**

6 Vered Tzin<sup>1,4†</sup>

7 Yuko Hojo<sup>2</sup>

8 Susan R. Strickler<sup>1</sup>

9 Lee Julia Bartsch<sup>1,5</sup>

10 Cairo M. Archer<sup>1</sup>

11 Kevin R. Ahern<sup>1</sup>

12 Shawn A. Christensen<sup>3</sup>

13 Ivan Galis<sup>2</sup>

14 Lukas A. Mueller<sup>1</sup>

15 Georg Jander<sup>1</sup>

16

17 <sup>1</sup>Boyce Thompson Institute for Plant Research, 533 Tower Rd, Ithaca, NY 14853, USA

18 <sup>2</sup>Institute of Plant Science and Resources, Okayama University, 2-20-1, Chuo, Kurashiki,  
19 Okayama, Japan

20 <sup>3</sup>USDA-ARS Chemistry Unit, Center for Medical, Agricultural, and Veterinary Entomology,  
21 Gainesville, FL 32608, U.S.A

22

23 Current address:

24 <sup>4</sup>Jacob Blaustein Institutes for Desert Research, Ben-Gurion University of the Negev, Sede  
25 Boqer, Israel

26 <sup>5</sup>Heidelberg University, 69117 Heidelberg, Germany

27 †Corresponding author: Vered Tzin

28 Phone: +972-8-6596749; Email: vtzin@bgu.ac.il

29 **HIGHLIGHT** (30 words)

30 A comprehensive transcriptic and metabolomic profiling time course of maize foliar responses to  
31 caterpillar feeding identifies genes for the synthesis of benzoxazinoids and phytohormones.

32

33 **ABSTRACT** (The abstract should be less than 200 words)

34 Insects such as beet armyworm caterpillars (*Spodoptera exigua*) cause extensive damage to  
35 maize (*Zea mays*) by consuming foliar tissue. Maize plants respond to such insect attack by  
36 triggering defense mechanisms that involve large changes in gene expression and the  
37 biosynthesis of specialized metabolites and defense signaling molecules. To investigate dynamic  
38 maize responses to herbivore feeding, leaves of maize inbred line B73 were infested with *S.*  
39 *exigua* caterpillars for 1 to 24 hours, followed by comprehensive transcriptomic and  
40 metabolomic characterization. Our results show that the most significant gene expression  
41 responses of maize to *S. exigua* feeding occur at early time points, within 4 to 6 hours after  
42 caterpillar infestation. However, both gene expression and metabolite profiles continued  
43 changing during the entire 24-hour experiment while photosynthesis genes were gradually  
44 decreased. The primary and specialized metabolism shift might be temporal and dynamic  
45 processes in the infested leaf tissue. We analyzed the effects of mutating genes in two major  
46 defense-related pathways, benzoxazinoids (*Bx1* and *Bx2*) and jasmonic acid (*Lox8*), using  
47 *Dissociation (Ds)* transposon insertions in maize inbred line W22. Together, these results show  
48 that maize leaves shift to implementation of chemical defenses within one hour after the  
49 initiation of caterpillar attack. Thus, the induced biosynthesis of specialized metabolites can have  
50 major effects in maize-caterpillar interactions.

51

52 **KEYWORD INDEX** (The list should not exceed 6-10 words)

53 Benzoxazinoid, *Zea mays*, jasmonic acid, time course, transcriptome, RNAseq, metabolite  
54 profile, salicylic acid, insect herbivore, *Spodoptera exigua*

55 **ABBREVIATIONS**

56 Jasmonic acid: JA; 4-dihydroxy-7-methoxy-1,4-benzoxazin-3-one: DIMBOA; 2-hydroxy-4,7-  
57 dimethoxy-1,4-benzoxazin-3-one: HDMBOA; glucoside: Glc; Fragments Per Kilobase of exon  
58 per Million fragments: FPKM; salicylic acid: SA;

## 59 INTRODUCTION

60 Plants perceive herbivory through mechanical cues from feeding damage, oviposition, and  
61 even insects walking on the leaf surface [1, 2], as well as through chemical cues from insect oral  
62 secretions and frass [3, 4]. In response to insect attack, up-regulated plant signaling pathways  
63 lead to the production of defensive metabolites. Two major signaling pathways that modulate  
64 plant defense against herbivores are regulated by salicylic acid (SA) and jasmonic acid (JA)  
65 derivatives[5, 6]. Jasmonates, in particular, regulate the production of toxic metabolites and a  
66 wide variety of other responses to insect herbivory [7-9].

67 In some graminaceous plants, including maize (*Zea mays*), wheat (*Triticum aestivum*), and  
68 rye (*Secale cereale*), JA induces the production of benzoxazinoids, a class of metabolites that can  
69 provide protection against insect herbivores, pathogens, and competing plants [10-13]. In maize,  
70 a series of nine enzymes (Bx1-Bx9) catalyze the biosynthesis of 2,4-dihydroxy-7-methoxy-1,4-  
71 benzoxazin-3-one glucoside (DIMBOA-Glc) from indole-3-glycerol phosphate [14, 15]. A  
72 family of three *O*-methyltransferases (Bx10-Bx12) methylate DIMBOA-Glc to form 2-hydroxy-  
73 4,7-dimethoxy-1,4-benzoxazin-3-one glucoside (HDMBOA-Glc) [16]. DIMBOA-Glc and  
74 HDMBOA-Glc are the most prevalent benzoxazinoids in maize seedlings [12, 14], though their  
75 relative abundance is quite variable among different maize inbred lines [16]. Recently, two  
76 additional enzymatic steps in this pathway were identified: a 2-oxoglutarate-dependent  
77 dioxygenase (Bx13) that catalyzes the conversion of DIMBOA-Glc into 2,4,7-trihydroxy-8-  
78 methoxy-1,4-benzoxazin-3-one glucoside (TRIMBOA-Glc) and an *O*-methyltransferase (Bx14)  
79 that converts 2,4-dihydroxy-7,8-dimethoxy-1,4-benzoxazin-3-one glucoside (DIM2BOA-Glc)  
80 into 2-hydroxy-4,7,8-trimethoxy-1,4-benzoxazin-3-one glucoside (HDM2BOA-Glc) [17].  
81 Feeding by chewing herbivores brings benzoxazinoid glucosides into contact with  $\beta$ -  
82 glucosidases, leading to the formation of toxic breakdown products [15, 18, 19]. Induced  
83 benzoxazinoid accumulation and methylation of DIMBOA-Glc to produce HDMBOA-Glc in  
84 response to caterpillar feeding [10, 20] has been associated with increased resistance to several  
85 lepidopteran herbivores, including *Spodoptera exigua* (beet armyworm), *Spodoptera littoralis*  
86 (Egyptian cotton leafworm), *Spodoptera frugiperda* (fall armyworm), and *Diatraea grandiosella*  
87 (southwestern cornborer) [11, 15, 21, 22].

88 In the present study, we aimed to elucidate the dynamic of plant responses to *S. exigua*  
89 caterpillar feeding by integrating gene expression using high-throughput RNA sequencing with

90 phytohormone and metabolite assays. Our study is focused on *S. exigua*, which has a wide host  
91 range, occurring as a serious pest of grains, vegetables, flower crops, and occasionally trees [23].  
92 Maize inbred line B73 leaves were infested with *S. exigua* caterpillars for the time periods up to  
93 24 hours, and statistical approaches were used to identify patterns of gene expression and  
94 metabolite changes. We confirmed the function of the specific benzoxazinoid and JA  
95 biosynthesis genes in maize-caterpillar interactions with *Ds* transposon insertions in inbred line  
96 W22.

## 97 **MATERIALS AND METHODS**

### 98 **Plants and growth conditions**

99 Single maize seeds were planted a 7.6 x 7.6-cm plastic pots (200 cm<sup>3</sup>), 1.5 cm deep, filled with  
100 moistened maize mix soil [produced by combining 0.16 m<sup>3</sup> Metro-Mix 360, 0.45 kg finely  
101 ground lime, 0.45 kg Peters Unimix (Griffin Greenhouse Supplies, Auburn NY, U.S.A, 68 kg  
102 Turface MVP (Banfield-Baker Crop., Horseheads NY, USA), 23 kg coarse quartz sand, and  
103 0.018 m<sup>3</sup> pasteurized field soil]. Plants were grown for two weeks in growth chambers under a  
104 controlled photoperiod regime with a 16-h-light/8-h-dark cycle, 180 mMol photons/m<sup>2</sup>/s light  
105 intensity at constant 23 °C and 60% humidity.

106

### 107 **Caterpillar bioassays**

108 *Spodoptera exigua* eggs were purchased from Benzon Research (Carlisle, PA, USA). After  
109 incubation for 48 h in a 29 °C incubator, first instar caterpillars were transferred to artificial diet  
110 (Beet Armyworm Diet, Southland Products Inc., Lake Village, AR, USA). Control and  
111 experimental maize seedlings received clip cages on the third leaf for 24 hours. For measuring  
112 the effect of caterpillar feeding on the maize transcriptome and metabolome, 2<sup>nd</sup> to 3<sup>rd</sup> instar *S.*  
113 *exigua* caterpillars were added to the clip cages for the final 1, 4, 6, or 24 hr of the experiment.  
114 All plant material was harvested at the same time. For *bx1::Ds* and *bx2::Ds* maize seedling  
115 caterpillar bioassays, individual caterpillars were confined on 10-day-old plants with micro-  
116 perforated polypropylene bags (15 cm × 61 cm; PJP Marketplace,  
117 <http://www.pjpmarketplace.com>) and caterpillar fresh weight was measured four days after the  
118 start of infestation. For *Lox8 (ts1)* knockout lines, 3<sup>rd</sup> instar caterpillars were placed in clip cages  
119 on the distal part of the 3<sup>rd</sup> seedling leaf for 24 hr (*lox8(ts1)::Ds*) or ten days (*lox8/ts1-ref*), and  
120 caterpillar fresh weight was measured.

121 **Total RNA extraction**

122 Leaf material was harvested, flash-frozen in liquid nitrogen, and ground to a fine powder using a  
123 paint shaker (Harbil, Wheeling, IL, USA) and 3 mm steel balls. The samples were homogenized,  
124 RNA was extracted using TRI Reagent (Sigma, St. Louis) and purified with the SV Total RNA  
125 isolation kit with on-column DNase treatment (Promega, Madison, WI, USA). Total RNA  
126 concentration and quality were assessed using a NanoDrop instrument (2000c; Thermo Fisher  
127 Scientific Inc. Waltham, MA USA).

128

129 **Transcriptome Sequencing, RNAseq data analysis and qRT-PCR analysis**

130 Tissue from three individual maize plants was combined into one experimental replicate, and  
131 four replicates were collected for each time point. The purified total RNA (2-3 µg) was used for  
132 the preparation of strand-specific RNAseq libraries [24, 25] and amplified for 16 cycles. The  
133 purified RNAseq libraries were quantified, and 20 ng of each was used for next generation  
134 sequencing using an Illumina HiSeq2000 instrument (Illumina, San Diego, CA) at the Weill  
135 Medicine School Facility (Cornell University, NY, USA) with a 101 bp single-end read length.  
136 Libraries were multiplexed and sequenced in one lane. Read quality values were checked using  
137 FastQC ([http://www.bioinformatics.babraham-  
138 m.ac.uk/projects/fastqc](http://www.bioinformatics.babraham.ac.uk/projects/fastqc)). Low-quality sequences  
139 and adapters were trimmed and removed using Fastq-mcf ([http://ea-  
141 utils.googlecode.com/svn/wiki/FastqMcf.wiki](http://ea-<br/>140 utils.googlecode.com/svn/wiki/FastqMcf.wiki)), with a minimum length of 50 bp and minimum  
142 quality value of 30. RNAseq analysis was performed following the protocol published by Anders  
143 et al. 2013 [26], using the maize genome version B73 AGP v3.22 as a reference [25]. The  
144 benzoxazinoid genes were also analyzed using AGP v3.20 to determine the values of *Bx7* and  
145 *Bx13*, which were excluded from the AGP v3.22 as low-confidence genes. Reads were mapped  
146 with the Tophat2 [27] and Cuffdiff packages [28] of Cufflinks version 2.2.1, using the geometric  
147 mean option. Transcripts showing at least one FPKM (Fragment per Kilobase of exon per  
148 Million fragments) of transcript in 3 or more replicates for each time point were kept for  
149 differentially expressed gene detection.

148 To verify the results of the RNA-seq analysis, an additional experiment was conducted, and total  
149 RNA was extracted. First strand cDNA was synthesized by M-MLV reverse transcriptase  
150 (TaKaRa) with a new biological experiment of RNA samples. qRT-PCR was conducted as

151 described previously [29], and the primer list of the seven genes is described in Supplementary  
152 Table S1.

153

#### 154 **Targeted and untargeted metabolite assays**

155 For assays of maize metabolites, approximately 2 cm of leaf material on which caterpillars had  
156 been feeding was collected from the third leaf, as well as from control plants without caterpillars.  
157 For non-targeted metabolite assays, frozen powder of fresh tissue was weighed in a 1.5-ml  
158 microcentrifuge tube, and extraction solvent (methanol/water/formic acid, 70:29.9:0.1, v/v) 1:3  
159 ratio was added [30]. The tubes were vortexed briefly, shaken for 40 min at 4 °C, and centrifuged  
160 for 5 min at 14,000 g. The samples were filtered through a 0.45-micron filter plate (EMD  
161 Millipore Corporation) by centrifuging at 2,000 g for 3 min and the supernatant was diluted 1:9,  
162 with the extraction solvent then transferred to an HPLC vial. LC-MS/MS analysis was performed  
163 on a Dionex UltiMate 3000 Rapid Separation LC System attached to a 3000 Ultimate diode array  
164 detector and a Thermo Q Exactive mass spectrometer (Thermo Scientific). The samples were  
165 separated on a Titan C18 7.5 cm x 2.1 mm x 1.9 µm Supelco Analytical Column (Sigma  
166 Aldrich), as previously described [17]. For data analysis, raw mass spectrometry data files were  
167 converted using the XCMS [31] followed by CAMERA R package [32]. The chromatographic  
168 peaks were compared with the retention time, accurate mass and UV spectrum of standards of  
169 DIMBOA, DIMBOA-glucoside and HDMBOA-glucoside. Other benzoxazinoids were identified  
170 based on their accurate masses and UV spectra.

171

#### 172 **Phytohormone analysis**

173 Maize leaves (30-100 mg fresh weight) were harvested, frozen in liquid nitrogen, and  
174 lyophilized. Samples were homogenized in a FastPrep®-24 (MP Biochemicals, Santa Ana, CA)  
175 using five 2.3 mm zirconia beads and 1 ml ethyl acetate solvent spiked with deuterated internal  
176 standards (IS) (25 ng d3-JA, 5 ng d3-JA-Ile, 10 ng d6-ABA, and 20 ng d4-SA). Samples were  
177 centrifuged for 15 min at 13,200 g, 4°C, and supernatants were collected in clean 2 ml  
178 microcentrifuge tubes. Pellet extraction was repeated once with 0.5 mL pure ethyl acetate and  
179 vortexing for 5 min at 23 °C, and supernatants were pooled with the previous fraction after  
180 centrifugation, as before. Samples were dried completely under vacuum in a miVac Quatro  
181 concentrator (Genevac Ltd, Ipswich, UK). Each sample was dissolved in 300 µL 70%

182 methanol/water (v/v) and vortexed for 5 min at 23 °C. Then, 1,700 µl buffer (84 mM ammonium  
183 acetate; pH 4.8) was added to each sample prior to application and retention of phytohormones  
184 on preconditioned 3 ml SPE columns (Bond Elut-C18, 200 mg, Agilent Technologies Inc., Santa  
185 Clara, CA, USA) set in a QIAvac 24 Plus system (QIAGEN, Germantown, MD, USA). After  
186 brief drying with an air stream, samples were eluted with 800 µl 85% methanol/water (v/v) into  
187 clean 1.5 ml microcentrifuge tubes. After brief spin at 12,000 g to remove insoluble materials, 10  
188 µL aliquots were analysed using a triple quadrupole LC-MS/MS 6410 system (Agilent  
189 Technologies) equipped with a Zorbax SB-C18 column [2.1 mm id × 50 mm, (1.8 µm), Agilent  
190 Technologies] kept in thermostat-controlled chamber at 35°C. The solvent gradient, A (0.1%  
191 formic acid in water) vs. B (0.1% formic acid in acetonitrile), was used as follows: 0 min, 15% B;  
192 4.5 min, 98% B; 12 min 98% B; 12.1 min, 15% B; and 18 min, 15% B, at a constant flow rate 0.4  
193 mL/min. Mass transitions, hormone/ Q1 precursor ion (m/z)/ Q3 product ion (m/z), were  
194 monitored for each compound as follows: JA/209/59, JA-Ile/322/130, abscisic acid  
195 (ABA)/263/153, SA/137/93, 12-oxophytodienoate (OPDA)/291/165, OH-JA/225/59, OH-JA-  
196 Ile/338/130, COOH-JA-Ile/352/130, JA-Val/308/116, d3-JA/212/59, d3-JA-Ile/325/130, d6-  
197 ABA/269/159, and d4-SA/141/97. The fragmentor (V)/ collision energy (V) parameters were set  
198 to 100/6 for JA, OH-JA, and OPDA; 135/15 for JA-Ile, OH-JA-Ile, COOH-JA-Ile and JA-Val;  
199 130/5 for ABA; and 90/12 for SA. JA, JA-Ile, ABA and SA amounts were directly calculated  
200 from the ratio of the endogenous hormone peak and the known deuterated internal standard.  
201 Compounds for which the authentic deuterated standards were not available were quantified  
202 using their structurally nearest deuterated internal standard, and expressed as equivalents of this  
203 compound (OPDA as d3-JA eq.; hydroxy (OH)-JA-Ile, carboxy (COOH)-JA-Ile, and JA-Val as  
204 d3-JA-Ile eq.). Phytohormone concentrations were calculated relative to the actual fresh mass of  
205 each sample used for extraction.

206

### 207 **Isolation of transposon insertions knockout lines and genotyping**

208 The *lox8/ts1-ref* mutant was acquired from the Maize Genetics Cooperation Stock Center at The  
209 University of Illinois at Urbana-Champaign (Maize COOP, <http://maizecoop.cropsci.uiuc.edu>) as  
210 a segregating 1:1 heterozygous: mutant population and selfed to generate a 1:2:1 segregating  
211 population, as describe previously [9]. The *Ds* transposon insertions in the W22 maize line and  
212 were identified in the following genes of interest through the *Ac/Ds* tagging project website

213 (<http://www.acdstagging.org>) [33]. Seed stocks for *bx1::Ds* (Gene ID- GRMZM2G085381; Ds-  
214 B.W06.0775), *bx2::Ds* (Gene ID - GRMZM2G085661; Ds-I.S07.3472) and *lox8(ts1)::Ds* (Gene  
215 ID - GRMZM2G104843; Ds-B.S06.0143). The primer list and Maize Genetics Cooperation  
216 Stock Center information is in Supplementary Table S2.

217

## 218 **Statistical analysis**

219 Partial Least Squares Discriminant Analysis (PLS-DA) was conducted as previously described  
220 [34] and the plot was drawn using MetaboAnalyst 3.0 software [35]. Venn diagrams were made  
221 using the Venny 2.1.0 drawing tool (<http://bioinfogp.cnb.csic.es/tools/venny/index.html>). The  
222 optimal number of clusters for the transcriptomic data for K-means clustering analysis was  
223 calculated using Gap [36] and NbClust R packages [37]. The K-mean analysis was performed on  
224 scaled and centered FPKM Log2 values and presented in standard (Z) score format. Gene  
225 ontology enrichment analysis was conducted using the PlantGSEA tool  
226 (<http://structuralbiology.cau.edu.cn/PlantGSEA/>) [38]. Fisher's exact test was used to take into  
227 account the number of genes in the group query, the total number of genes in a gene set, and the  
228 number of overlapping genes, with the false discovery rate calculated using the Hochberg  
229 procedure ( $P$  value = 0.05). Statistical comparisons were made using JMP Pro 11 (SAS,  
230 [www.jmp.com](http://www.jmp.com)).

231

## 232 **RESULTS AND DISCUSSION**

### 233 **Transcriptomic analysis of maize responses to caterpillar feeding**

234 To investigate the global transcriptomic changes in response to caterpillar feeding, the  
235 third leaves of maize inbred line B73 seedlings were infested with two 2nd-3rd *S. exigua* instars  
236 for 0, 1, 4, 6, or 24 hr. A recent study of the effect of *S. littoralis* on maize defense mechanisms  
237 showed that induced herbivore resistance is highly localized and dependent on benzoxazinoid  
238 biosynthesis [39]. Therefore, we focused our transcriptomic assays on the caterpillar-infested  
239 section of the leaf. Caterpillar exposure was started in a staggered manner, such that all samples  
240 were harvested at the same time on the same day (Supplemental Fig. S1). Comparison of  
241 transcriptome data (Illumina RNAseq) to the B73 genomic sequence [25], which has predicted  
242 gene models (AGPv3.22; [www.maizedb.org](http://www.maizedb.org)), showed approximately 40,000 unique transcripts  
243 (Supplemental Table S3). The expression patterns of seven selected genes were confirmed by



244 quantitative reverse transcriptase-PCR (qRT-PCR) using independently generated plant samples.  
245 Comparison of gene expression using these two methods showed a similar expression pattern  
246 and a high correlation coefficient ( $R$ -value; Supplemental Fig. S2). After data filtering (genes  
247 which had expression values of zero more than three times were excluded), approximately  
248 20,000 transcripts from the RNAseq data set were analyzed for each of the four caterpillar-  
249 infested time points to detect genes that were differentially expressed relative to untreated  
250 control leaves (Supplemental Table S4). The gene expression levels were used to conduct a  
251 Partial Least Squares Discriminant Analysis (PLS-DA) for each of the biological replicates (Fig.  
252 1A). Samples from each time point cluster with one another and the expression profiles separate  
253 gradually over time from the 0 hr (control) sample. Samples from the 24-hour time point  
254 clustered furthest from the control samples, indicating the greatest changes in gene expression  
255 after the onset of caterpillar feeding. Genes with significant expression differences ( $P$  value  $\leq$   
256 0.05, FDR adjusted) and at least two-fold changes relative to the controls for at least one of the  
257 time points were selected for further analysis (Supplemental Table S5). After the initiation of  
258 caterpillar feeding, thousands of transcripts showed altered expression at each of the time points.  
259 The number of down-regulated genes increased gradually and, in the 24 hr sample, was similar  
260 to the number of the up-regulated genes (1,838 down-regulated and 1,954 up-regulated; Fig. 1B).  
261 The distribution of up- and down-regulated genes was calculated at each time point and present  
262 in the Venn diagram (Fig. 1C). Although a unique set of genes was increased at each time point  
263 (total 3,078), expression of a large number of genes (914) was induced in all time points. The  
264 comparison of genes altered by caterpillar feeding after 24 hr and 1 hr is presented in  
265 Supplemental Fig. S3.

266 Metabolic changes were studied in caterpillar-infested maize leaf samples using  
267 untargeted LC-MS/MS in negative (Supplemental Fig. S6) and positive (Supplemental Fig. S7)  
268 ion mode. PLS-DA clustering pattern of the untargeted metabolite analysis is presented in Figure  
269 1D. The negative ion mode plot showed significant separation from the controls at 6 and 24 hr  
270 after initiation of caterpillar feeding, whereas the PLS-DA plot of the positive ion mode showed  
271 significant separation only after 24 hr. The overall similarity of the transcriptomic and  
272 metabolomic data suggested that caterpillar-induced gene expression changes lead to induced  
273 changes in the metabolome at the same or later time points.

274

## 275 **Clustering the transcriptome dataset**

276 The significantly differentially expressed genes were subjected to *K*-Means clustering  
277 using Pearson Correlation distances (*R*). The *K*-Means analysis was performed on scaled and  
278 centered FPKM Log<sub>2</sub> values, and each cluster is represented by the *Z*-score (standard score) of  
279 the gene expression of the set of genes showing similar response patterns to caterpillar herbivory.  
280 The 16 clusters were divided into four expression groups according to the trends of the standard  
281 score: i) clusters with strong increasing average (two standard deviations); ii) clusters with  
282 moderately increasing average (approximately one standard deviation), ii) clusters with  
283 moderately decreasing average (approximately one standard deviation), and iv) clusters with  
284 moderately decreasing average that significantly deviates from the population average (high  
285 FPKM) (Fig. 2). The distribution of genes into the 16 clusters is presented in Supplemental Table  
286 S8.

287 To elucidate the biological processes that contribute to each gene expression cluster,  
288 over-representation analysis was performed using PlantCyc output from PlantGSEA tool [38]  
289 (Table 1). The first pattern includes two clusters of genes (1 and 2) that are highly induced by  
290 caterpillar feeding. Although these clusters contain a relatively small number of genes (133 and  
291 74 respectively), many pathways of transcripts associated with plant defense and stress responses  
292 were over-represented, including biosynthesis of phenylpropanoids, suberin, jasmonic acid,  
293 monosaccharides, methionine biosynthesis, and methionine degradation toward ethylene  
294 biosynthesis and *S*-adenosyl-*L*-methionine. The second pattern includes six clusters (3-8) of  
295 moderately increased gene expression, mainly associated with sucrose degradation and cellulose  
296 biosynthesis, as well as phenylpropanoids, suberin, JA,  $\beta$ -alanine, glutamine, TCA cycle, fatty  
297 acid biosynthesis, and cytokinin-*O*-glucoside biosynthesis. The moderately decreased gene  
298 expression pattern (clusters 9-14) contains genes associate with photorespiration, nitrogen  
299 fixation, and flavonoid biosynthesis. For the *K*-means analysis, we used the FPKM dataset.  
300 Therefore, we identified a pattern of genes with high FPKM and moderately decreased (pattern  
301 4). These two clusters (15-16) include genes that are involved in the photosynthesis light  
302 reaction, Calvin-Benson-Bassham cycle, gluconeogenesis, and glycolysis (Table 1). However,  
303 this reduction in photosynthetic genes might be temporal follow by readjustment of the  
304 photosynthetic capacity under the biotic stresses [40]. Together, these observations indicate that

305 there is a shift from primary metabolism toward the synthesis of defensive metabolites in  
306 response to *S. exigua* feeding on maize.

307

### 308 **Plant hormone-related genes and metabolites induced by *Spodoptera exigua* damage**

309 To identify the transcriptional signatures of hormonal responses in caterpillar-infested  
310 maize plants, the Hormonometer tool was used [41]. We evaluated similarities in the expression  
311 profiles elicited by caterpillar herbivory and those induced by application of the plant hormones  
312 methyl-jasmonate, 1-aminocyclopropane-1-carboxylic acid (a precursor for ethylene), ABA,  
313 indole-3-acetic acid (auxin), cytokinin (zeatin), brassinosteroid, gibberellic acid, and salicylic  
314 acid. As the hormone treatments were conducted with *Arabidopsis thaliana* (Arabidopsis), we  
315 selected the orthologous genes from Arabidopsis and the B73 genome. The genes included in the  
316 RNAseq analysis after the filtering processes contain a corresponding Arabidopsis Probeset ID,  
317 and a total of 10,242 Arabidopsis orthologs of maize genes were used as input for the  
318 Hormonometer analysis (Supplemental Table S8). As shown in Figure 3, genes associated with  
319 JA-, ABA-, auxin-, and SA-dependent signaling were highly induced after 1 hr of infestation,  
320 followed by moderate induction of these phytohormone signaling pathways at later time points  
321 (Fig. 3). Ethylene-, gibberellin-, cytokinin-, and brassinosteroid- responsive genes showed a  
322 negative correlation with caterpillar-induced genes and those that were induced within half an  
323 hour after hormonal treatment and moderately increased after 3 hr of hormonal treatment. A  
324 dendrogram analysis of the data showed that hormone-related gene expression changes gradually  
325 from 1 to 24 hr, and that responses in the first hour after caterpillar feeding are distinct from  
326 those observed at later time points. This suggests that major hormonal induction occurs within  
327 one hour after caterpillar infestation (Fig. 3).

328 We measured alteration in the phytohormones induced by *S. exigua* feeding using LC-  
329 MS/MS. As shown in Figure 4, the ABA level was significantly increased at 4 and 6 hr after the  
330 initiation of caterpillar feeding. Although SA levels showed a similar trend, the results were non-  
331 significant. The JA level was significantly increased from 1 to 24 hr, and other JA conjugates  
332 (JA-Val, JA-Ile, OH-JA-Ilu, and COOH-JA-Ile) were highly induced from 4- to 24 hr after  
333 caterpillar feeding. The JA precursor OPDA was only increased in abundance after 24 hr.

334

### 335 **Caterpillar-induced changes in jasmonic acid biosynthesis**

336 Abundance of JA, SA and ABA was affected by *S. exigua* feeding (Fig. 4). However, the  
337 greatest induction at the gene expression and metabolite level was JA-related and occurred at 4  
338 hr to the 24 hr after the start of infestation. Maize lipoxygenases (LOX) initiate fatty acid  
339 oxidation pathways for the synthesis of compounds that function in plant defense against insect  
340 herbivory [42, 43] (Supplemental Fig. S4A). Up-regulation of gene expression (Fig. 2), as well  
341 as hormonal response signatures (Fig. 3), and phytohormone quantification (Fig. 4) suggested  
342 that caterpillar feeding elicits production of a complex array of oxylipins. Therefore, we  
343 investigated the expression of genes associated with oxylipin and JA production [44, 45]  
344 <http://www.plantcyc.org>; Fig. 5A) in more detail. In general, the first steps of the pathway are  
345 highly induced by caterpillar feeding. Lipoxygenases that enable production of 12-oxo-  
346 phytodienoic acid (12-OPDA) and its downstream JA products (13-LOXs; *LOX7*, *9*, *10*, *11* and  
347 *13*) were induced from 4 to 24 hr. In contrast, *LOX8/ts1* (GRMZM2G104843) was highly  
348 induced from the first hour of infestation. A similar pathway involving 9-LOX activity on  
349 linolenic and linoleic acid (*LOX3,4,5* and *6*), which leads to the 12-OPDA positional isomer, 10-  
350 oxo-11-phytodienoic acid (10-OPDA) and 10-oxo-11-phytoenoic acid (10-OPEA) were highly  
351 induced. Allene oxide synthase (AOS) genes, which encode the second step of the jasmonic acid  
352 pathway, also were highly increased. In addition, allene-oxide cyclase (AOC) genes, which  
353 encode the third step in the pathway, were upregulated at all time points. Elevated JA levels have  
354 been associated with insect resistance in several plant species [9, 46, 47].

355 The expression patterns of oxophytodienoate reductases (*OPR*), which encode the fourth  
356 step of the jasmonic acid pathway, were varied: *OPR7* was highly increased whereas *OPR1* and  
357 *OPR2* were slightly increased after caterpillar feeding. Moreover, the expression levels of *OPR3*  
358 and *OPR6* were reduced. The subsequent enzymatic steps, encoded by acyl-CoA oxidase, enoyl-  
359 CoA hydratase, acetyl-CoA C-acyltransferase and long-chain-3-hydroxyacyl-CoA  
360 dehydrogenase were slightly increased 4 hr and later after initiation of caterpillar feeding (Fig.  
361 5A). This suggested that other intermediates of the oxylipin pathway also might have functions  
362 in plant defense.

363 With *LOX8* expression in response to *S. exigua* feeding predominating over the other  
364 maize 13-LOXs, we genetically investigated its role in caterpillar-induced jasmonate production  
365 using two different *LOX8/ts1* knockout alleles (*lox8/ts1::Ds* and *lox8/ts1-ref*). While several  
366 jasmonates were significantly less induced by *S. exigua* in *lox8/ts1::Ds* (Fig. 5B) and *lox8/ts1-ref*

367 (Supplemental Fig. S4B), they were not completely absent, suggesting that multiple 13-LOXs  
368 can provide substrates induced jasmonate biosynthesis. These results are consistent with our  
369 expression data, which show that expression of multiple 13-LOXs is induced, and parallel  
370 previous findings in maize and Arabidopsis [9, 48]. Compared to wildtype controls, caterpillar  
371 weight gain was not significantly increased when feeding on *lox8* knockout lines (data not  
372 shown). Christensen et al (2013) showed increased in *S. exigua* bodyweight after feeding of  
373 *lox10* mutants, and suggested that although both LOX-8 and LOX-10 are 13-LOXs, they differ in  
374 their sub-cellular locations, providing substrate for the green leaf volatile and JA biosynthesis  
375 pathways, respectively [9].

376 Comparing the expression levels of oxylipin biosynthetic genes showed that 9-LOX  
377 genes are highly induced relative to 13-LOX genes (Fig. 5A). Whereas 13-LOX-derived  
378 linolenate oxidation produces 12-OPDA and JA, 9-LOX-derived linoleic acid oxidation enables  
379 the production of 10-oxo-11-phytoenoic acid 10-OPEA [44] and likely as yet unknown  
380 downstream products. In maize, fungal infection by southern leaf blight (*Cochliobolus*  
381 *heterostrophus*) causes induction of 9-LOXs and production of 10-OPEA, which displays local  
382 phytoalexin activity [49]. Therefore, we hypothesize that the 9-LOX branch of the oxylipin  
383 pathway also functions in direct defense or defense signaling in response to caterpillar feeding.

384

### 385 **Benzoxazinoid biosynthesis is involved in herbivore defense mechanisms**

386 The role of benzoxazinoids in defense against herbivory has been studied extensively in  
387 maize [12, 13, 50] (Fig. 6A). Therefore, we elaborated benzoxazinoid gene expression and  
388 function in response to *S. exigua* feeding (Fig. 6B and Supplemental Table S11). As shown in  
389 Figure 6B, transcripts of *Bx1*, *Bx*, *Bx3*, and *Bx6* were highly induced from 4 to 24 hr, whereas  
390 *Bx4*, *Bx5*, *Bx8*, *Bx9*, and *Bx7* were highly induced after 4 and 6 hr of caterpillar infestation. *Bx10*,  
391 *Bx11*, and *Bx13* were increased within one hour of caterpillar infestation, suggesting that an  
392 immediate response to caterpillar feeding is the conversion of DIMBOA-Glc to HDMBOA-Glc  
393 or DIM2BOA-Glc. However, *Bx14* was induced only after 4 and 6 hr of caterpillar infestation.  
394 Both DIMBOA-Glc and HDMBOA-Glc abundance gradually increased from 4 to 24 hr (Fig.  
395 6C).

396 To further investigate the effect of *S. exigua* feeding on benzoxazinoid content, we  
397 employed the previously identified *bx1::Ds* and *bx2::Ds* mutations in the W22 genetic

398 background [29, 51]. DIMBOA-Glc and HDMBOA-Glc, were significantly increased in the  
399 W22 wildtype treated with caterpillars compare to untreated plants (Fig. 6D). However, the  
400 levels of these compounds were very low in the *bx1::Ds* and *bx2::Ds*, even with caterpillar  
401 infestation. At least two other maize genes, GRMZM2G046191 (*IGL1*), and GRMZM5G841619  
402 (*TSAI*), encode the same indole-3-glycerol phosphate lyase enzymatic activity as *Bx1* [52, 53].  
403 Thus, the absence of DIMBOA-Glc and HDMBOA-Glc induction by caterpillar feeding on the  
404 *bx1::Ds* mutant line indicates that there is either metabolic channeling or the other two genes are  
405 not strongly regulated in response to caterpillar feeding (Supplemental Table S5) The abundance  
406 of HDMBOA-Glc was significantly increased in *bx2::Ds* plants after caterpillar infestation. It is  
407 possible that the other cytochrome P450 enzymes in the pathway (Bx3, Bx4, or Bx5) catalyze the  
408 initial Bx2 indole oxidation reaction to a more limited extent.

409 Corn leaf aphids (*Rhopalosiphum maidis*) grow better on *bx1::Ds* and *bx2::Ds* mutant  
410 lines than on wildtype W22 [29, 51]. To determine whether this is also the case for *S. exigua*,  
411 caterpillar body weight was measured after four days of feeding on mutant and wildtype  
412 seedlings. There was a significant increase in caterpillar body mass on *bx1::Ds* and *bx2::Ds*  
413 mutant seedlings relative to wildtype W22 (Fig. 6E). A similar increase in body weight was  
414 observed with *S. littoralis* feeding on maize inbred line B73 *bx1* mutant plants relative to  
415 wildtype B73 [39].

416

## 417 CONCLUSION

418 In this study, we examined the dynamic effects of caterpillar feeding on maize, one of the  
419 world's most important crop plants. Transcriptional and metabolic changes showed rapid  
420 responses occurring in the first hour after caterpillar infestation. The transcriptomic and  
421 metabolomics changes continue increasing up to the 24 hour time point. Our analysis of the  
422 transcriptomic and metabolomic data has led to the characterization of the role of genes from two  
423 major defense-related pathways, benzoxazinoids, and jasmonic acid. Future research on these  
424 benzoxazinoids and phytohormones that are induced by *S. exigua* feeding in our experiments will  
425 enable the breeding of maize cultivars with enhanced resistance to lepidopteran herbivores. In  
426 addition, this high-throughput dataset can be utilized to discover key genes that play a role in  
427 maize metabolic processes during biotic stress responses.

428

429 **SUPPLEMENTARY DATA**

430 **Supplemental Table S1.** Primers used for quantitative RT-PCR analysis.

431

432 **Supplemental Table S2.** Primers used to screen for knockout mutations.

433

434 **Supplemental Table S3.** RNAseq raw data

435

436 **Supplemental Table S4.** RNAseq raw data after data filtering (genes that had expression values  
437 of zero more than three times were excluded).

438

439 **Supplemental Table S5.** RNAseq data for four caterpillar feeding time points after Cuffdiff.

440

441 **Supplemental Table S6.** LC-TOF-MS data from negative ion mode.

442

443 **Supplemental Table S7.** LC-TOF-MS data from positive ion mode.

444

445 **Supplemental Table S8.** List of differentially expressed maize genes for at least one time point  
446 (+/- > 2 fold changed) with *P* value < 0.05, FDR adjusted, used for PLD-SA analysis, clustering  
447 over-representation, and PageMan analysis.

448

449 **Supplemental Table S9.** Orthologous Arabidopsis and maize genes used for Hormonometer  
450 analysis.

451

452 **Supplemental Table S10.** RNAseq data of benzoxazinoid genes for four caterpillar feeding time  
453 points after Cuffdiff (V3.20).

454

455 **Supplemental Table S11.** Bx parameters using LC-TOF-MS.

456

457 **Supplemental Figure S1.** Design of the caterpillar feeding experiments. The second leaf of two-  
458 week-old B73 maize plants was enclosed in a clip cage. At staggered intervals, two 2<sup>nd</sup> to 3<sup>rd</sup>  
459 instar *S. exigua* caterpillars were added to each cage. Leaf tissue was harvested after 1 to 24 h of

460 caterpillar feeding. All samples, including controls (untreated), were harvested within a 45-  
461 minute time period. Harvested tissue was used for assays of gene expression by Illumina  
462 sequencing, as well as for metabolite profiling by LC/MS, and HPLC.

463 **Supplemental Figure S2.** Comparison of RNAseq and qRT-PCR gene expression data from two  
464 independent sets of experimental samples. The following genes were measured by qRT-PCR and  
465 RNAseq and normalized to adenine phosphate transferase 1 (*APT1*): GRMZM2G131907, *Bx6* -  
466 GRMZM6G617209, Phe Ammonia-Lyase (*PAL*) - GRMZM2G063917, 12-oxo-phytodienoic  
467 acid reductase 7 (*OPR7*) - GRMZM2G148281, Lipoxygenase 10 (*LOX10*) - GRMZM2G015419,  
468 Lipoxygenase 3 (*LOX3*) - GRMZM2G109130, and Lipoxygenase 8 (*LOX8*) -  
469 GRMZM2G104843. Mean +/- SE of n = 4, for RNAseq (orange) and n =5 for qRT-PCR (blue).  
470 *R* value = correlation coefficient.

471

472 **Supplemental Figure S3.** Venn diagram describing the number of genes up- or down-regulated  
473 by caterpillar infestation in 1hr and 24 hr relative to control and 1hr relative to 24 hr. *P* value  
474 <0.05 FDR and fold change > 2 or < 0.5.

475

476 **Supplemental Figure S4.** Effects of caterpillar feeding on jasmonic acid biosynthesis. A) The  
477 jasmonic acid biosynthesis pathway in maize. B) JA and JA conjugate levels of *lox8/ts1-ref*  
478 (*LOX8*; GRMZM2G104843) gene knockout in response to caterpillar attack. Black bars –  
479 untreated, white bars- caterpillar infestation for 24 hr. \**P* < 0.05, two-tailed Student's *t*-test. ND  
480 = not detected.

481

## 482 **ACKNOWLEDGEMENTS**

483 We thank Navid Movahed and Meena Haribal for the technical support with this project. This  
484 research was funded by US National Science Foundation awards 1139329 and 1339237 to GJ,  
485 and Vaadia-BARD Postdoctoral Fellowship Award FI-471-2012 to VT.

486

487



488 **REFERENCES**

489

- 490 1. Mithofer, A., G. Wanner, and W. Boland, *Effects of feeding Spodoptera littoralis on lima*  
491 *bean leaves. II. Continuous mechanical wounding resembling insect feeding is sufficient*  
492 *to elicit herbivory-related volatile emission.* Plant Physiol, 2005. **137**(3): p. 1160-1168.
- 493 2. Hilker, M. and T. Meiners, *Early herbivore alert: Insect eggs induce plant defense.*  
494 *Journal of Chemical Ecology*, 2006. **32**(7): p. 1379-1397.
- 495 3. Alborn, H.T., et al., *An elicitor of plant volatiles from beet armyworm oral secretion.*  
496 *Science*, 1997. **276**(5314): p. 945-949.
- 497 4. Ray, S., et al., *Maize Plants Recognize Herbivore-Associated Cues from Caterpillar*  
498 *Frass.* Journal of Chemical Ecology, 2015. **41**(9): p. 781-792.
- 499 5. Howe, G.A. and G. Jander, *Plant immunity to insect herbivores.* Annual Review of Plant  
500 *Biology*, 2008. **59**: p. 41-66.
- 501 6. Wu, J. and I.T. Baldwin, *New Insights into Plant Responses to the Attack from Insect*  
502 *Herbivores.* Annual Review of Genetics, 2010. **44**(1): p. 1-24.
- 503 7. Kessler, A., R. Halitschke, and I.T. Baldwin, *Silencing the Jasmonate Cascade: Induced*  
504 *Plant Defenses and Insect Populations.* Science, 2004. **305**(5684): p. 665-668.
- 505 8. Schmelz, E.A., et al., *Identity, regulation, and activity of inducible diterpenoid*  
506 *phytoalexins in maize.* Proceedings of the National Academy of Sciences, 2011. **108**(13):  
507 p. 5455-5460.
- 508 9. Christensen, S.A., et al., *The maize lipoxygenase, ZmLOX10, mediates green leaf volatile,*  
509 *jasmonate and herbivore-induced plant volatile production for defense against insect*  
510 *attack.* Plant Journal, 2013. **74**(1): p. 59-73.
- 511 10. Oikawa, A., et al., *Accumulation of HDMBOA-Glc is induced by biotic stresses prior to*  
512 *the release of MBOA in maize leaves.* Phytochemistry, 2004. **65**(22): p. 2995-3001.
- 513 11. Oikawa, A., et al., *Induced accumulation of 2-hydroxy-4,7-dimethoxy-1,4-benzoxazin-3-*  
514 *one glucoside (HDMBOA-Glc) in maize leaves.* Phytochemistry, 2001. **56**(7): p. 669-675.
- 515 12. Frey, M., et al., *Benzoxazinoid biosynthesis, a model for evolution of secondary metabolic*  
516 *pathways in plants.* Phytochemistry, 2009. **70**(15-16): p. 1645-51.
- 517 13. Adhikari, K.B., et al., *Benzoxazinoids: Cereal phytochemicals with putative therapeutic*  
518 *and health-protecting properties.* Mol Nutr Food Res, 2015. **59**(7): p. 1324-38.
- 519 14. Frey, M., et al., *Analysis of a chemical plant defense mechanism in grasses.* Science,  
520 1997. **277**(5326): p. 696-699.
- 521 15. Niemeyer, H.M., *Hydroxamic Acids Derived from 2-Hydroxy-2H-1,4-Benzoxazin-3(4H)-*  
522 *one: Key Defense Chemicals of Cereals.* J Agric Food Chem, 2009. **57**(5): p. 1677-1696.
- 523 16. Meihls, L.N., et al., *Natural Variation in Maize Aphid Resistance Is Associated with 2,4-*  
524 *Dihydroxy-7-Methoxy-1,4-Benzoxazin-3-One Glucoside Methyltransferase Activity.* Plant  
525 *Cell*, 2013. **25**(6): p. 2341-2355.
- 526 17. Handrick, V., et al., *Biosynthesis of 8-O-methylated benzoxazinoid defense compounds in*  
527 *maize.* Plant Cell, 2016.
- 528 18. Esen, A., *Purification and Partial Characterization of Maize (Zea-Mays L) Beta-*  
529 *Glucosidase.* Plant Physiol, 1992. **98**(1): p. 174-182.
- 530 19. Oikawa, A., et al., *Purification and characterization of a beta-glucosidase specific for*  
531 *2,4-dihydroxy-7-methoxy-1,4-benzoxazin-3-one (DIMBOA) glucoside in maize.*  
532 *Zeitschrift Fur Naturforschung C-a Journal of Biosciences*, 1999. **54**(3-4): p. 181-185.

- 533 20. Tzin, V., et al., *Genetic mapping shows intraspecific variation and transgressive*  
534 *segregation for caterpillar-induced aphid resistance in maize*. *Mol Ecol*, 2015. **24**(22): p.  
535 5739-50.
- 536 21. Glauser, G., et al., *Induction and detoxification of maize 1,4-benzoxazin-3-ones by insect*  
537 *herbivores*. *Plant Journal*, 2011. **68**(5): p. 901-911.
- 538 22. Hedin, P.A., F.M. Davis, and W.P. Williams, *2-Hydroxy-4,7-Dimethoxy-1,4-Benzoxazin-*  
539 *3-One (N-O-Me-Dimboa), a Possible Toxic Factor in Corn to the Southwestern Corn-*  
540 *Borer*. *Journal of Chemical Ecology*, 1993. **19**(3): p. 531-542.
- 541 23. Kim, Y. and N. Kim, *Cold hardiness in Spodoptera exigua (Lepidoptera: Noctuidae)*.  
542 *Environmental Entomology*, 1997. **26**(5): p. 1117-1123.
- 543 24. Chen, Y.R., et al., *A cost-effective method for Illumina small RNA-Seq library preparation*  
544 *using T4 RNA ligase 1 adenylated adapters*. *Plant Methods*, 2012. **8**.
- 545 25. Zhong, S., et al., *High-throughput illumina strand-specific RNA sequencing library*  
546 *preparation*. *Cold Spring Harb Protoc*, 2011. **2011**(8): p. 940-9.
- 547 26. Anders, S., et al., *Count-based differential expression analysis of RNA sequencing data*  
548 *using R and Bioconductor*. *Nature Protocols*, 2013. **8**(9): p. 1765-1786.
- 549 27. Kim, D., et al., *TopHat2: accurate alignment of transcriptomes in the presence of*  
550 *insertions, deletions and gene fusions*. *Genome Biology*, 2013. **14**(4): p. R36.
- 551 28. Trapnell, C., et al., *Differential gene and transcript expression analysis of RNA-seq*  
552 *experiments with TopHat and Cufflinks*. *Nat. Protocols*, 2012. **7**(3): p. 562-578.
- 553 29. Tzin, V., et al., *Dynamic Maize Responses to Aphid Feeding Are Revealed by a Time*  
554 *Series of Transcriptomic and Metabolomic Assays*. *Plant Physiol*, 2015. **169**(3): p. 1727-  
555 43.
- 556 30. Mijares, V., et al., *Near-isogenic lines for measuring phenotypic effects of DIMBOA-Glc*  
557 *methyltransferase activity in maize*. *Plant Signal Behav*, 2013. **8**(10): p. doi: 10 4161/psb  
558 26779.
- 559 31. Smith, C.A., et al., *XCMS: Processing mass spectrometry data for metabolite profiling*  
560 *using Nonlinear peak alignment, matching, and identification*. *Analytical Chemistry*,  
561 2006. **78**(3): p. 779-787.
- 562 32. Kuhl, C., et al., *CAMERA: An Integrated Strategy for Compound Spectra Extraction and*  
563 *Annotation of Liquid Chromatography/Mass Spectrometry Data Sets*. *Analytical*  
564 *Chemistry*, 2012. **84**(1): p. 283-289.
- 565 33. Vollbrecht, E., et al., *Genome-wide distribution of transposed Dissociation elements in*  
566 *maize*. *Plant Cell*, 2010. **22**(6): p. 1667-1685.
- 567 34. Tzin, V., et al., *Expression of a bacterial bi-functional chorismate mutase/prephenate*  
568 *dehydratase modulates primary and secondary metabolism associated with aromatic*  
569 *amino acids in Arabidopsis*. *Plant Journal*, 2009. **60**(1): p. 156-167.
- 570 35. Xia, J., et al., *MetaboAnalyst: a web server for metabolomic data analysis and*  
571 *interpretation*. *Nucleic Acids Res*, 2009. **37**(Web Server issue): p. W652-60.
- 572 36. Tibshirani, R., G. Walther, and T. Hastie, *Estimating the number of data clusters via the*  
573 *Gap statistic*. *Journal of the Royal Statistical Society B*, 2001. **63**: p. 411-423.
- 574 37. Charrad, M., et al., *Nbclust: An R Package for Determining the Relevant Number of*  
575 *Clusters in a Data Set*. *Journal of Statistical Software*, 2014. **61**(6): p. 1-36.
- 576 38. Yi, X., Z. Du, and Z. Su, *PlantGSEA: a gene set enrichment analysis toolkit for plant*  
577 *community*. *Nucleic Acids Research*, 2013. **41**(W1): p. W98-W103.

- 578 39. Maag, D., et al., *Highly localized and persistent induction of Bx1-dependent herbivore*  
579 *resistance factors in maize*. The Plant Journal, 2016: p. n/a-n/a.
- 580 40. Attaran, E., et al., *Temporal dynamics of growth and photosynthesis suppression in*  
581 *response to jasmonate signaling*. Plant Physiol, 2014. **165**(3): p. 1302-1314.
- 582 41. Volodarsky, D., et al., *HORMONOMETER: A Tool for Discerning Transcript Signatures*  
583 *of Hormone Action in the Arabidopsis Transcriptome*. Plant Physiol, 2009. **150**(4): p.  
584 1796-1805.
- 585 42. Porta, H. and M. Rocha-Sosa, *Plant lipoxygenases. Physiological and molecular features*.  
586 Plant Physiol, 2002. **130**(1): p. 15-21.
- 587 43. Christensen, S.A., et al., *Maize death acids, 9-lipoxygenase-derived cyclopente(a)nones,*  
588 *display activity as cytotoxic phytoalexins and transcriptional mediators*. Proceedings of  
589 the National Academy of Sciences of the United States of America, 2015. **112**(36): p.  
590 11407-11412.
- 591 44. Borrego, E. and M. Kolomiets, *Synthesis and Functions of Jasmonates in Maize*. Plants,  
592 2016. **5**(4): p. 41.
- 593 45. Koo, A. and G. Howe, *Catabolism and Deactivation of the Lipid-Derived Hormone*  
594 *Jasmonoyl-Isoleucine*. Front Plant Sci, 2012. **3**(19).
- 595 46. Ellis, C., I. Karafyllidis, and J.G. Turner, *Constitutive Activation of Jasmonate Signaling*  
596 *in an Arabidopsis Mutant Correlates with Enhanced Resistance to Erysiphe*  
597 *cichoracearum, Pseudomonas syringae, and Myzus persicae*. Molecular Plant-Microbe  
598 Interactions, 2002. **15**(10): p. 1025-1030.
- 599 47. Shivaji, R., et al., *Plants on Constant Alert: Elevated Levels of Jasmonic Acid and*  
600 *Jasmonate-Induced Transcripts in Caterpillar-Resistant Maize*. Journal of Chemical  
601 Ecology, 2010. **36**(2): p. 179-191.
- 602 48. Chauvin, A., et al., *Four 13-lipoxygenases contribute to rapid jasmonate synthesis in*  
603 *wounded Arabidopsis thaliana leaves: a role for lipoxygenase 6 in responses to long-*  
604 *distance wound signals*. New Phytologist, 2013. **197**(2): p. 566-575.
- 605 49. Christensen, S.A., et al., *Maize death acids, 9-lipoxygenase-derived cyclopente(a)nones,*  
606 *display activity as cytotoxic phytoalexins and transcriptional mediators*. Proceedings of  
607 the National Academy of Sciences, 2015. **112**(36): p. 11407-11412.
- 608 50. Ahmad, S., et al., *Benzoxazinoid metabolites regulate innate immunity against aphids*  
609 *and fungi in maize*. Plant Physiol, 2011. **157**(1): p. 317-27.
- 610 51. Betsiashvili, M., K.R. Ahern, and G. Jander, *Additive effects of two quantitative trait loci*  
611 *that confer Rhopalosiphum maidis (corn leaf aphid) resistance in maize inbred line*  
612 *Mo17*. Journal of experimental botany, 2015. **66**: p. 571-578.
- 613 52. Frey, M., et al., *An herbivore elicitor activates the gene for indole emission in maize*.  
614 Proceedings of the National Academy of Sciences, 2000. **97**(26): p. 14801-14806.
- 615 53. Kriechbaumer, V., et al., *Characterisation of the tryptophan synthase alpha subunit in*  
616 *maize*. BMC Plant Biology, 2008. **8**: p. 44-44.

617

618

619 **TABLES**

620 **Table 1. Enrichment analysis of metabolic pathways grouped by K-means clustering.** Gene  
 621 expression patterns were sorted into 16 clusters, as determined by *K*-Means analysis of  
 622 transcripts detected in the B73 maize in inbred line at 0, 1, 4, 6 and 24 hr after caterpillar  
 623 feeding.

624

|                                                               | Cluster number | Number of genes in the cluster | Description                                                         | # of genes | P value | FDR     |
|---------------------------------------------------------------|----------------|--------------------------------|---------------------------------------------------------------------|------------|---------|---------|
| Group 1 – strong increasing average (two standard deviations) | 1              | 133                            | benzoate biosynthesis II (CoA-independent, non- $\beta$ -oxidative) | 3          | 4.0E-05 | 3.3E-03 |
|                                                               |                |                                | suberin biosynthesis                                                | 3          | 1.7E-04 | 6.9E-03 |
|                                                               |                |                                | phenylpropanoid biosynthesis, initial reactions                     | 2          | 6.0E-04 | 1.2E-02 |
|                                                               |                |                                | trans-cinnamoyl-CoA biosynthesis                                    | 2          | 4.9E-04 | 1.2E-02 |
|                                                               |                |                                | adenine and adenosine salvage VI                                    | 2          | 7.2E-04 | 1.2E-02 |
|                                                               | 2              | 74                             | S-adenosyl-L-methionine cycle II                                    | 4          | 3.3E-08 | 1.4E-06 |
|                                                               |                |                                | jasmonic acid biosynthesis                                          | 5          | 6.9E-08 | 1.5E-06 |
|                                                               |                |                                | methionine degradation I (to homocysteine)                          | 3          | 2.2E-06 | 3.1E-05 |
|                                                               |                |                                | traumatin and (Z)-3-hexen-1-yl acetate biosynthesis                 | 3          | 4.1E-06 | 3.5E-05 |
|                                                               |                |                                | divinyl ether biosynthesis II                                       | 3          | 4.1E-06 | 3.5E-05 |
|                                                               |                |                                | linalool biosynthesis                                               | 3          | 1.4E-05 | 9.7E-05 |
|                                                               |                |                                | S-adenosyl-L-methionine biosynthesis                                | 2          | 1.2E-04 | 7.3E-04 |
|                                                               |                |                                | ethylene biosynthesis from methionine                               | 3          | 1.9E-04 | 9.8E-04 |
|                                                               |                |                                | 2'-deoxymugineic acid phytosiderophore biosynthesis                 | 2          | 5.7E-04 | 2.7E-03 |
|                                                               |                |                                | UDP-D-xylose and UDP-D-glucuronate biosynthesis                     | 2          | 1.1E-03 | 4.1E-03 |
|                                                               |                |                                | methylerythritol phosphate pathway                                  | 2          | 1.0E-03 | 4.1E-03 |
| tryptophan biosynthesis                                       | 2              | 1.9E-03                        | 6.5E-03                                                             |            |         |         |
| glycogen biosynthesis II (from UDP-D-Glucose)                 | 2              | 2.4E-03                        | 7.8E-03                                                             |            |         |         |
| methionine biosynthesis II                                    | 2              | 3.4E-03                        | 1.0E-02                                                             |            |         |         |
| colanic acid building blocks biosynthesis                     | 2              | 9.4E-03                        | 1.9E-02                                                             |            |         |         |
| galactose degradation III                                     | 2              | 1.0E-02                        | 1.9E-02                                                             |            |         |         |
| Group 2 – moderately increasing average (approximate)         | 3              | 557                            | homogalacturonan biosynthesis                                       | 5          | 8.6E-05 | 1.0E-02 |
|                                                               |                |                                | cellulose biosynthesis                                              | 6          | 1.1E-03 | 4.3E-02 |
|                                                               |                |                                | cytokinins-O-glucoside biosynthesis                                 | 8          | 1.1E-03 | 4.3E-02 |
|                                                               | 4              | 493                            | phenylpropanoid biosynthesis, initial reactions                     | 3          | 3.7E-04 | 1.8E-02 |
|                                                               |                |                                | trans-cinnamoyl-CoA biosynthesis                                    | 3          | 2.8E-04 | 1.8E-02 |

|                                                                                 |    |                                                       |                                                     |         |         |         |
|---------------------------------------------------------------------------------|----|-------------------------------------------------------|-----------------------------------------------------|---------|---------|---------|
| moderately one standard deviation )                                             | 5  | 357                                                   | sucrose degradation I                               | 4       | 3.2E-04 | 1.7E-02 |
|                                                                                 |    |                                                       | suberin biosynthesis                                | 4       | 2.0E-04 | 1.7E-02 |
|                                                                                 | 6  | 207                                                   | jasmonic acid biosynthesis                          | 6       | 5.3E-07 | 5.3E-05 |
|                                                                                 |    |                                                       | pyrimidine ribonucleosides degradation II           | 3       | 1.1E-05 | 5.7E-04 |
|                                                                                 |    |                                                       | methylerythritol phosphate pathway                  | 3       | 3.3E-04 | 1.1E-02 |
|                                                                                 |    |                                                       | $\beta$ -alanine biosynthesis II                    | 3       | 1.5E-03 | 3.3E-02 |
|                                                                                 |    |                                                       | glutamine biosynthesis III                          | 3       | 1.7E-03 | 3.3E-02 |
|                                                                                 | 7  | 562                                                   | <b>No results</b>                                   |         |         |         |
|                                                                                 | 8  | 408                                                   | sucrose degradation III                             | 8       | 4.4E-06 | 6.8E-04 |
|                                                                                 |    |                                                       | traumatin and (Z)-3-hexen-1-yl acetate biosynthesis | 3       | 6.4E-04 | 1.7E-02 |
|                                                                                 |    | alanine degradation II (to D-lactate)                 | 3                                                   | 6.4E-04 | 1.7E-02 |         |
|                                                                                 |    | divinyl ether biosynthesis II                         | 3                                                   | 6.4E-04 | 1.7E-02 |         |
|                                                                                 |    | sucrose degradation I                                 | 4                                                   | 5.4E-04 | 1.7E-02 |         |
|                                                                                 |    | TCA cycle variation III (eukaryotic)                  | 5                                                   | 3.1E-04 | 1.7E-02 |         |
|                                                                                 |    | CDP-diacylglycerol biosynthesis II                    | 4                                                   | 9.6E-04 | 1.8E-02 |         |
|                                                                                 |    | CDP-diacylglycerol biosynthesis I                     | 4                                                   | 9.6E-04 | 1.8E-02 |         |
|                                                                                 |    | triacylglycerol biosynthesis                          | 4                                                   | 1.5E-03 | 2.5E-02 |         |
|                                                                                 |    | cyclopropane fatty acid (CFA) biosynthesis            | 3                                                   | 2.0E-03 | 2.9E-02 |         |
|                                                                                 |    | cyclopropane and cyclopropene fatty acid biosynthesis | 3                                                   | 2.0E-03 | 2.9E-02 |         |
|                                                                                 |    | glyoxylate cycle                                      | 3                                                   | 3.8E-03 | 4.9E-02 |         |
|                                                                                 |    | pyrimidine ribonucleotides interconversion            | 3                                                   | 4.2E-03 | 5.0E-02 |         |
| Group 3 – moderately decreasing average (approximately one standard deviation ) | 9  | 456                                                   | <b>No results</b>                                   |         |         |         |
|                                                                                 | 10 | 387                                                   | stachyose biosynthesis                              | 3       | 3.7E-04 | 3.1E-02 |
|                                                                                 | 11 | 244                                                   | photorespiration                                    | 5       | 8.2E-06 | 4.4E-04 |
|                                                                                 | 12 | 399                                                   | luteolin biosynthesis                               | 3       | 6.0E-04 | 1.3E-02 |
|                                                                                 |    |                                                       | leucodelphinidin biosynthesis                       | 4       | 6.1E-04 | 1.3E-02 |
|                                                                                 |    |                                                       | leucopelargonidin and leucocyanidin biosynthesis    | 4       | 6.1E-04 | 1.3E-02 |
|                                                                                 |    |                                                       | flavonol biosynthesis                               | 3       | 1.9E-03 | 3.2E-02 |
|                                                                                 |    |                                                       | nitrogen fixation                                   | 2       | 3.4E-03 | 4.5E-02 |
|                                                                                 | 13 | 500                                                   | <b>No results</b>                                   |         |         |         |
|                                                                                 | 14 | 487                                                   | <b>No results</b>                                   |         |         |         |
| Group 4 – moderately decreasing averages that significant                       | 15 | 150                                                   | photosynthesis light reactions                      | 4       | 5.7E-07 | 2.5E-05 |
|                                                                                 |    |                                                       | Calvin-Benson-Bassham cycle                         | 5       | 5.8E-05 | 1.3E-03 |
|                                                                                 |    |                                                       | gluconeogenesis I                                   | 4       | 1.6E-03 | 2.4E-02 |
|                                                                                 |    |                                                       | glycine cleavage complex                            | 2       | 5.4E-03 | 4.7E-02 |
|                                                                                 |    |                                                       | glycolysis I                                        | 4       | 6.3E-03 | 4.7E-02 |
|                                                                                 | 16 | 66                                                    | methylerythritol phosphate pathway                  | 2       | 8.0E-04 | 5.2E-03 |

|                                                                        |  |                                |   |         |         |
|------------------------------------------------------------------------|--|--------------------------------|---|---------|---------|
| tly<br>deviate<br>from the<br>populatio<br>n average<br>(high<br>FPKM) |  | cyanate degradation            | 2 | 4.6E-04 | 5.2E-03 |
|                                                                        |  | photosynthesis light reactions | 2 | 3.2E-04 | 5.2E-03 |
|                                                                        |  | Calvin-Benson-Bassham cycle    | 3 | 7.5E-04 | 5.2E-03 |
|                                                                        |  | gluconeogenesis I              | 3 | 1.4E-03 | 7.2E-03 |
|                                                                        |  | Rubisco shunt                  | 2 | 1.0E-02 | 3.8E-02 |

625

Figure 1.

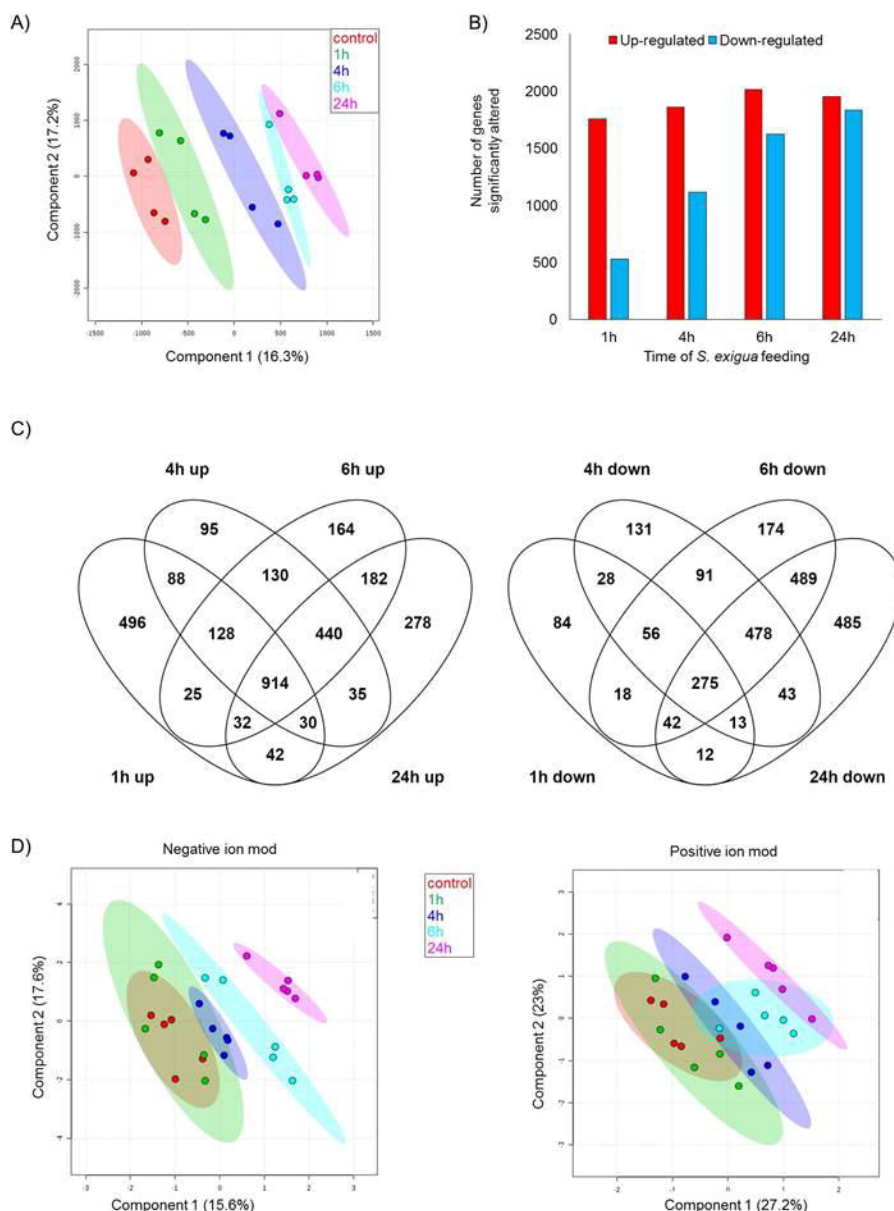

**Figure 1.** Transcriptomic and metabolomic overview of a time course of *S. exigua* feeding on maize inbred line B73 foliage. A) Partial least squares Discriminant Analysis (PLS-DA) generated from 20,825 genes (FPKM > 0 in at least 18 samples). Ovals indicate 95% confidence intervals. B) A total numbers of transcripts that were significantly up- or down-regulated; and C) Venn diagram illustrating the number of genes up- or down-regulated by caterpillar infestation in the time course.  $P$  value < 0.05 FDR and fold change > 2 or < 0.5. D, E) Untargeted metabolomics of maize leaf responses to caterpillar feeding. Partial least squares Discriminant Analysis (PLS-DA) plots identified by negative ion mode (2,044 mass signals) and positive ion mode (1,917 mass signals). Ovals indicate 95% confidence intervals.

**Figure 2.**

Group 1 -  
strong increasing average  
(two standard deviations)

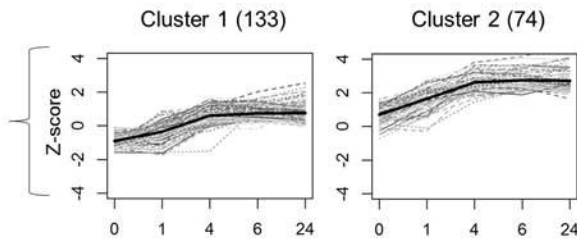

Group 2 -  
moderately increasing  
average (approximately  
one standard deviation)

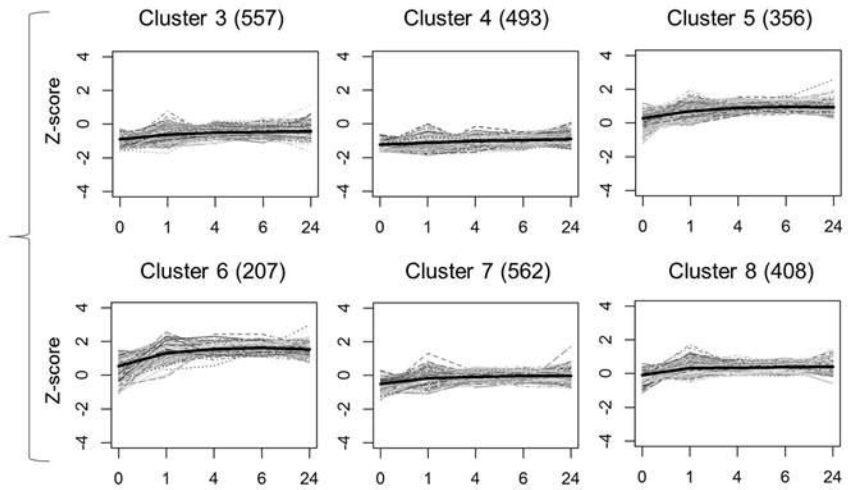

Group 3 -  
moderately decreasing  
average (approximately  
one standard deviation)

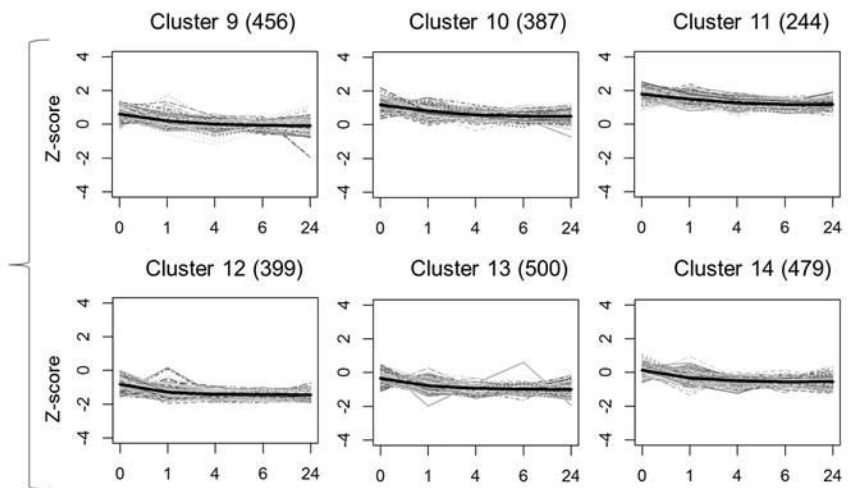

Group 4 -  
moderately decreasing  
averages that significantly  
deviate from the population  
average (high FPKM)

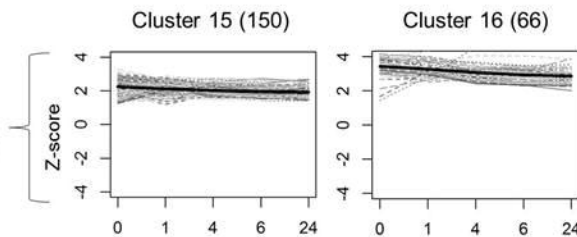

**Figure 2.** K-means clustering of genes expressed during caterpillar infestation. Gene expression in FPKM Log2 values after *S. exigua* feeding over a 0-24 h time course. Genes were selected according to the following parameters: *P* value < 0.05 FDR and fold change > +/- 2 (5,470 genes). In bold: Z-score represents the number of standard deviations between the genes represented in the cluster and the mean of the population distribution. In brackets: the number of genes in each cluster.



**Figure 3.**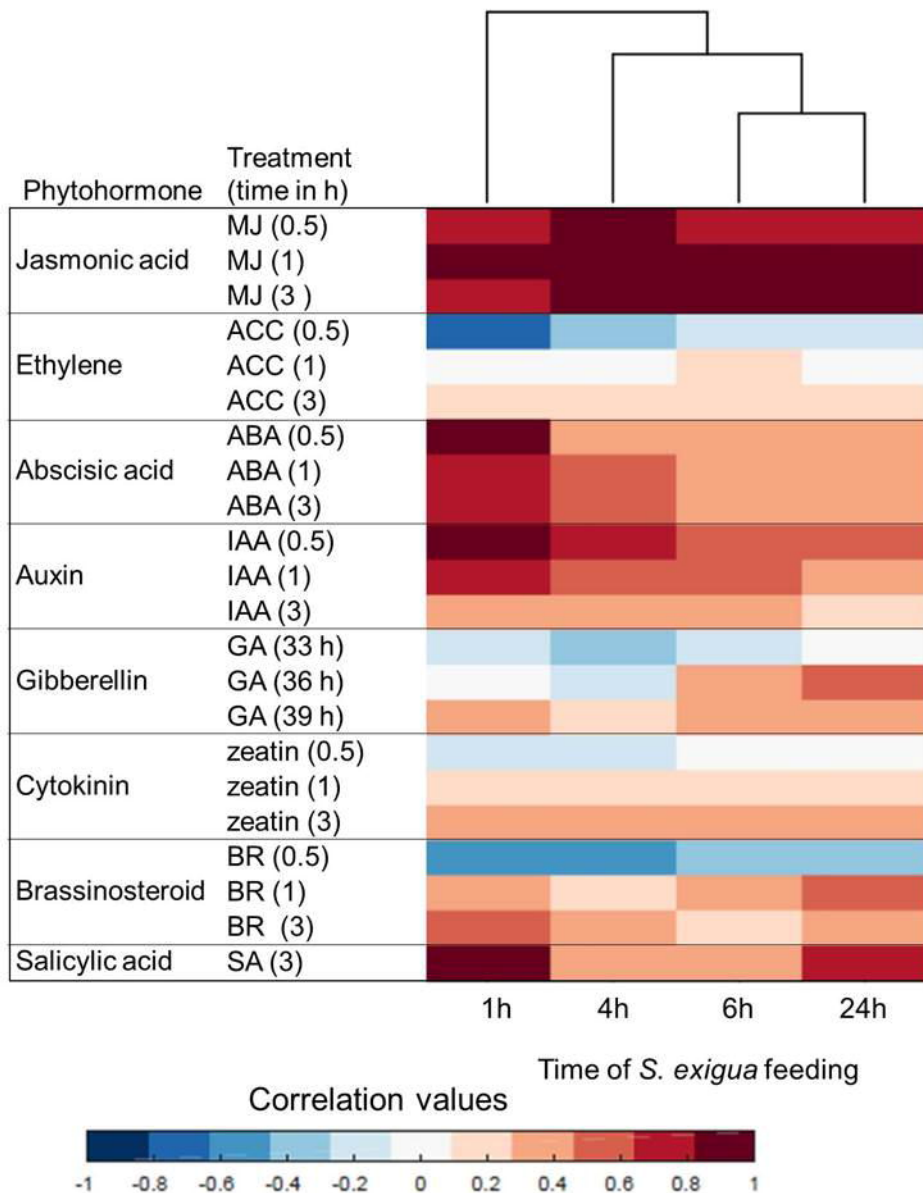

**Figure 3.** Plant hormone signatures based on transcriptomic data generated after *S. exigua* feeding on maize leaves. Red, indicates a positive correlation between the maize *S. exigua* caterpillar treatment and a particular hormone response; blue, negative correlation. MJ; methyl jasmonate, ACC; 1-aminocyclopropane-1-carboxylic acid (precursor of ethylene), ABA; abscisic acid, IAA; indole-3-acetic acid, GA; gibberellic acid, BR; brassinosteroid, SA; salicylic acid. The analysis was conducted using the Hormonometer tool [41].

Figure 4.

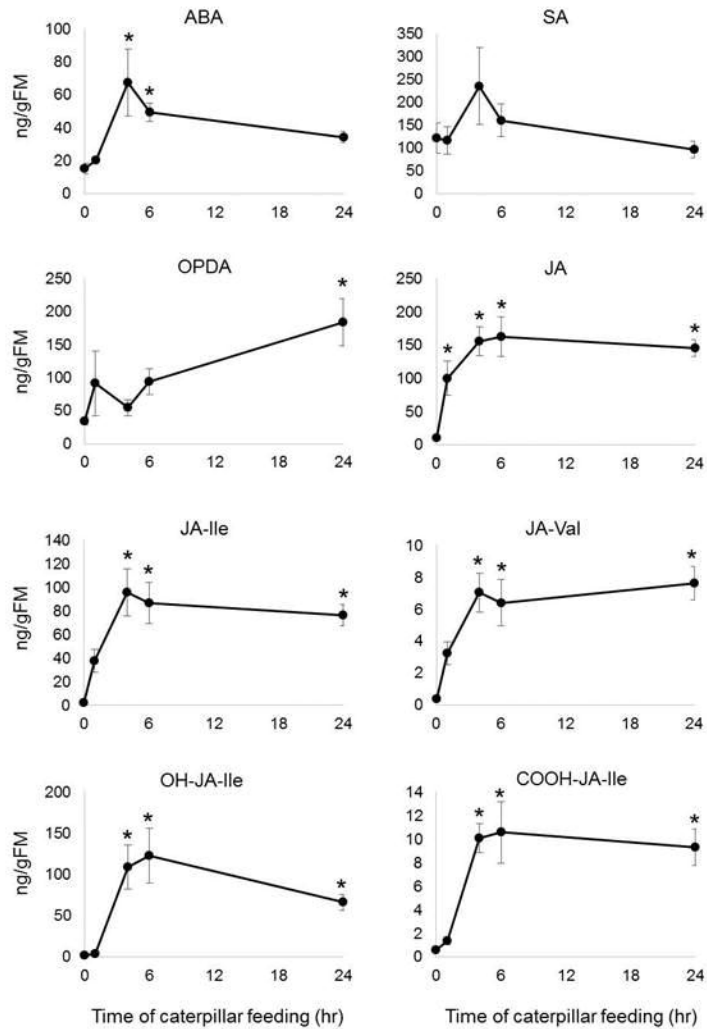

**Figure 4.** Plant phytohormones produced after *S. exigua* feeding on maize leaves. JA, jasmonic acid; ABA, abscisic acid; and SA, salicylic acid. Mean  $\pm$  SE of  $n = 5$ . \* $P < 0.05$  Student's *t*-test relative to unfested control.

Figure 5

A)

| Gene Accession | Enzymatic activity                         | Gene name | con/con | 1h/con | 4h/con | 6h/con | 24h/con |
|----------------|--------------------------------------------|-----------|---------|--------|--------|--------|---------|
| GRMZM2G109130  | Lipoxygenase3 (9-LOX)                      | Lox3      | 1.00    | 11.91  | 78.01  | 78.08  | 71.98   |
| GRMZM2G109056  | Lipoxygenase4 (9-LOX)                      | Lox4      | 1.00    | 81.16  | 18.56  | 16.12  | 11.86   |
| GRMZM2G102760  | Lipoxygenase5 (9-LOX)                      | Lox5      | 1.00    | 20.84  | 77.69  | 73.16  | 43.82   |
| GRMZM2G040095  | Lipoxygenase6 (9-LOX)                      | Lox6      | 1.00    | 1.32   | 3.23   | 2.86   | 2.57    |
| GRMZM2G070092  | Lipoxygenase7 (13-LOX)                     | Lox7      | 1.00    | 3.71   | 1.08   | 0.57   | 0.95    |
| GRMZM2G104843  | Lipoxygenase8 (13-LOX)                     | Lox8; ts1 | 1.00    | 34.02  | 7.24   | 5.97   | 3.89    |
| GRMZM2G017616  | Lipoxygenase9 (13-LOX)                     | Lox9      | 1.00    | 2.21   | 4.27   | 4.57   | 3.69    |
| GRMZM2G015419  | Lipoxygenase10 (13-LOX)                    | Lox10     | 1.00    | 1.37   | 2.43   | 2.24   | 1.80    |
| GRMZM2G009479  | Lipoxygenase11 (13-LOX)                    | Lox11     | 1.00    | 0.99   | 2.80   | 3.09   | 3.44    |
| GRMZM2G822593  | Lipoxygenase13 (13-LOX)                    | Lox13     | 1.00    | 28.09  | 20.80  | 23.78  | 18.87   |
| GRMZM2G156861  | Lipoxygenase1 and 2                        | Lox1/2    | 1.00    | 1.62   | 112.05 | 106.64 | 80.12   |
| GRMZM2G002178  | Hydroperoxide dehydratase                  | AOS2a     | 1.00    | 6.11   | 11.62  | 73.41  | 42.09   |
| GRMZM2G033098  | Hydroperoxide dehydratase                  | AOS1c     | 1.00    | 86.22  | 80.15  | 78.53  | 49.34   |
| GRMZM2G067225  | Hydroperoxide dehydratase                  | AOS2b     | 1.00    | 32.88  | 50.04  | 61.06  | 35.31   |
| GRMZM2G415793  | Allene-oxide cyclase                       | AOC       | 1.00    | 4.01   | 7.80   | 7.43   | 5.04    |
| GRMZM2G077316  | Allene-oxide cyclase                       | AOC1      | 1.00    | 4.08   | 12.51  | 11.86  | 9.98    |
| GRMZM2G106303  | 12-oxophytodienoate reductase              | OPR1      | 1.00    | 1.68   | 2.29   | 6.05   | 2.27    |
| GRMZM2G000236  | 12-oxophytodienoate reductase              | OPR2      | 1.00    | 2.69   | 5.44   | 12.62  | 7.78    |
| GRMZM2G156712  | 12-oxophytodienoate reductase              | OPR3      | 1.00    | 0.79   | 1.34   | 2.66   | 1.19    |
| GRMZM2G068947  | 12-oxophytodienoate reductase              | OPR6      | 1.00    | 0.45   | 0.27   | 0.25   | 0.17    |
| GRMZM2G148281  | 12-oxophytodienoate reductase              | OPR7      | 1.00    | 6.47   | 10.96  | 10.07  | 6.91    |
| GRMZM2G864319  | Acyl-CoA oxidase                           |           | 1.00    | 1.84   | 3.00   | 3.50   | 3.15    |
| GRMZM2G094655  | Enoyl-CoA hydratase 2                      |           | 1.00    | 0.85   | 1.82   | 1.78   | 3.38    |
| GRMZM2G132903  | Enoyl-CoA hydratase 2                      |           | 1.00    | 0.81   | 1.11   | 1.54   | 2.34    |
| GRMZM2G110201  | Acetyl-CoA C-acetyltransferase             |           | 1.00    | 2.22   | 3.70   | 3.82   | 4.25    |
| GRMZM2G459755  | Long-chain-3-hydroxyacyl-CoA dehydrogenase |           | 1.00    | 0.97   | 1.49   | 1.74   | 2.32    |
| GRMZM2G854613  | Long-chain-3-hydroxyacyl-CoA dehydrogenase |           | 1.00    | 0.89   | 1.30   | 1.57   | 2.24    |

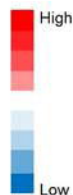

B)

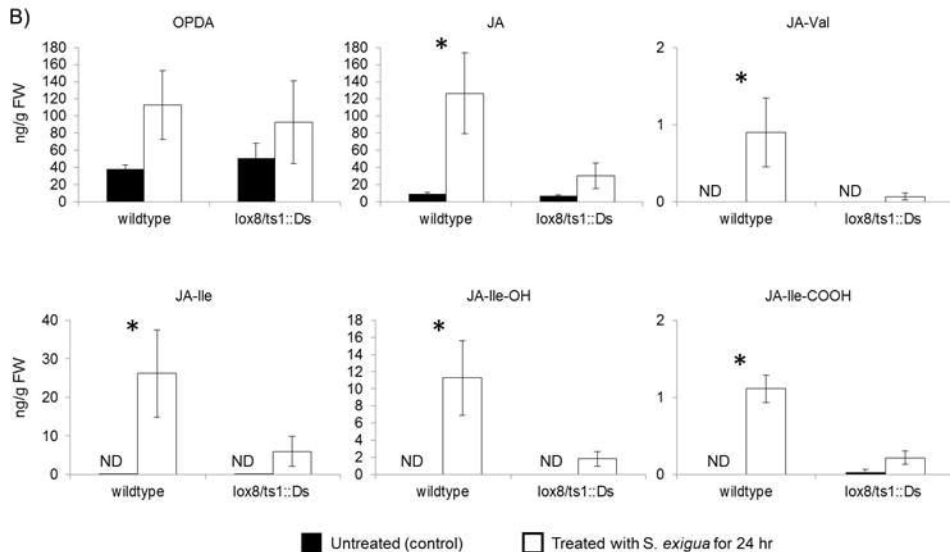

**Figure 5.** Effects of caterpillar feeding on jasmonic acid biosynthesis. A) Heat map of gene expression that is related to jasmonic acid (JA) biosynthesis. Values are presented in fold change relative to untreated control. Mean  $\pm$  SE of  $n = 4$ . B) JA and JA conjugate levels of in a *lox8/ts1::Ds* gene knockout line in response to caterpillar attack. Black bars, untreated, white bars- caterpillar infestation for 24 hr. \* $P < 0.05$ , two-tailed Student's *t*-test. ND = not detected.

**Figure 6.**

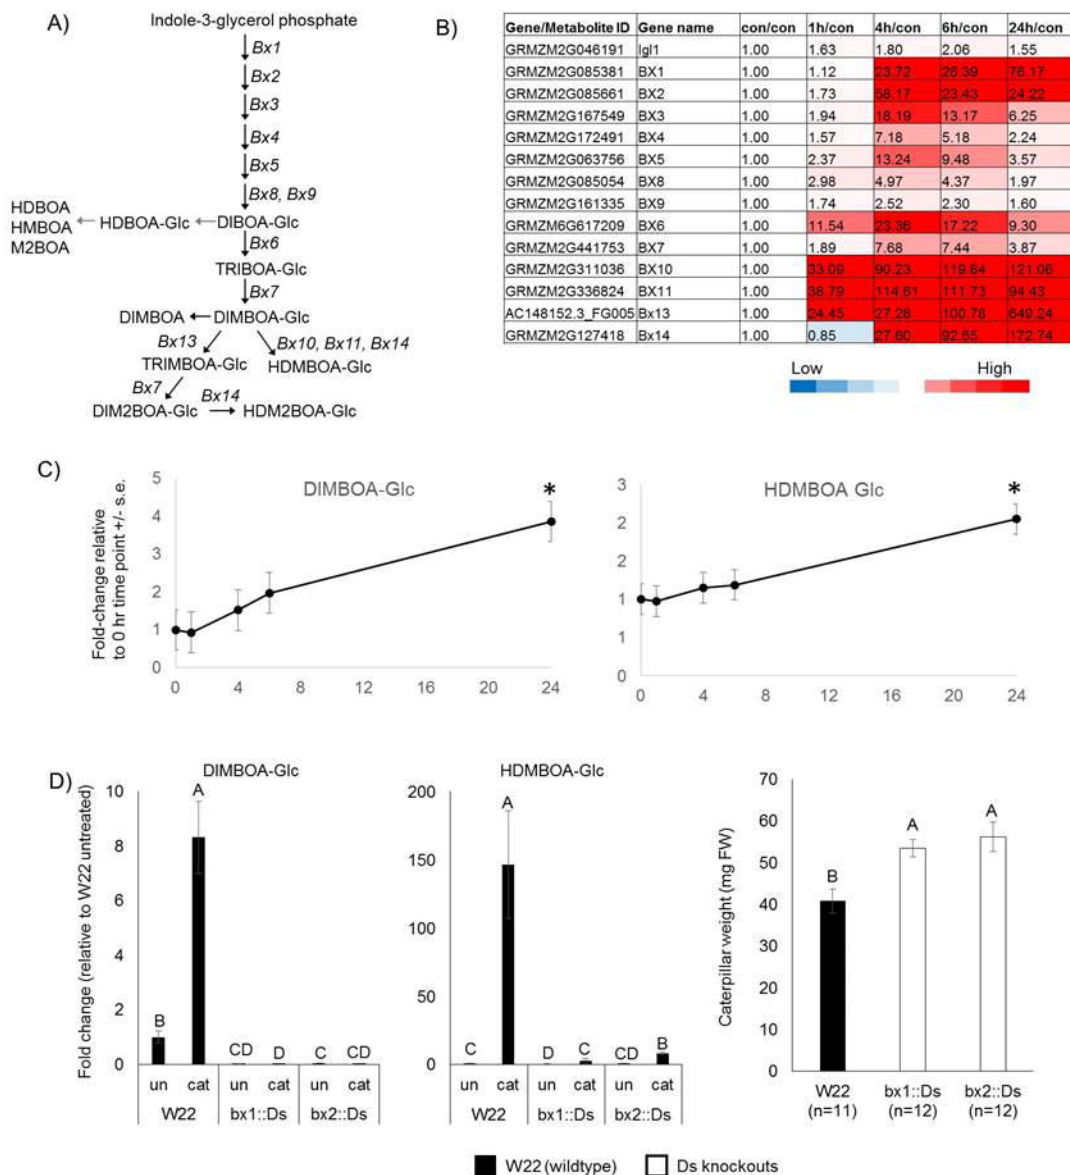

**Figure 6.** Effects of caterpillar feeding on benzoxazinoid-related genes and metabolites. A) The benzoxazinoid biosynthesis pathway in maize. B) Heat map of gene expression and C) DIMBOA-Glc and HDMBOA-Glc abundance over time after caterpillar feeding. Values are presented as fold change relative to untreated control. Mean  $\pm$  SE of  $n = 4$  for transcriptomic data,  $n = 5$  metabolic data). D) *S. exigua* caterpillar body weight after four days on wildtype W22, *bx1::Ds*, and *bx2::Ds* mutant plants. E) Abundance of DIMBOA-Glc and HDMBOA-Glc in wildtype W22, *bx1::Ds*, and *bx2::Ds*, with and without caterpillar feeding. Different letters above the bars indicate significant differences,  $P < 0.05$ , ANOVA followed by Tukey's HSD test.
